# Supplementary material for: Stacking-Mediated Type-I/Type-II Transition in Two-Dimensional MoTe2/PtS2 Heterostructure: A First-Principles Simulation
Source: MDPI journal article supplement (doi:10.3390/cryst12030425), 2022-03-18
Supplement: s1 [file s1]

Archive with 1 entries (1 files):
- crystals-1637385-supplementary.pdf
