# Supplementary material for: Stacking-Mediated Type-I/Type-II Transition in Two-Dimensional MoTe2/PtS2 Heterostructure: A First-Principles Simulation
Source: MDPI journal article supplement (doi:10.3390/cryst12030425), 2022-03-18
Supplement: s1 [file s1 › crystals-1637385-supplementary.pdf]

# **Stacking Tuning the Electronic and Optical Performances of the MoTe<sub>2</sub>/PtS<sub>2</sub> Heterostructure as a Promising Photocatalyst in Water Splitting**

Kai Ren <sup>1,\*</sup>, Zhengyang Zhu <sup>2</sup>, Ke Wang <sup>3</sup>, Wenyi Huo <sup>1</sup>, Zhen Cui <sup>4</sup>

<sup>1</sup> School of Mechanical and Electronic Engineering, Nanjing Forestry University, Nanjing 211189, China; wyhuo@njfu.edu.cn

<sup>2</sup> School of Mechanical Engineering, Wanjiang University of Technology, Maanshan 243031, China; zhengyang\_zhu@126.com

<sup>3</sup> School of Automation, Xi'an University of Posts and Telecommunications, Xi'an 710121, China; kewang@xupt.edu.cn

<sup>4</sup> School of Automation and Information Engineering, Xi'an University of Technology, Xi'an 710048, China; zcui@xaut.edu.cn

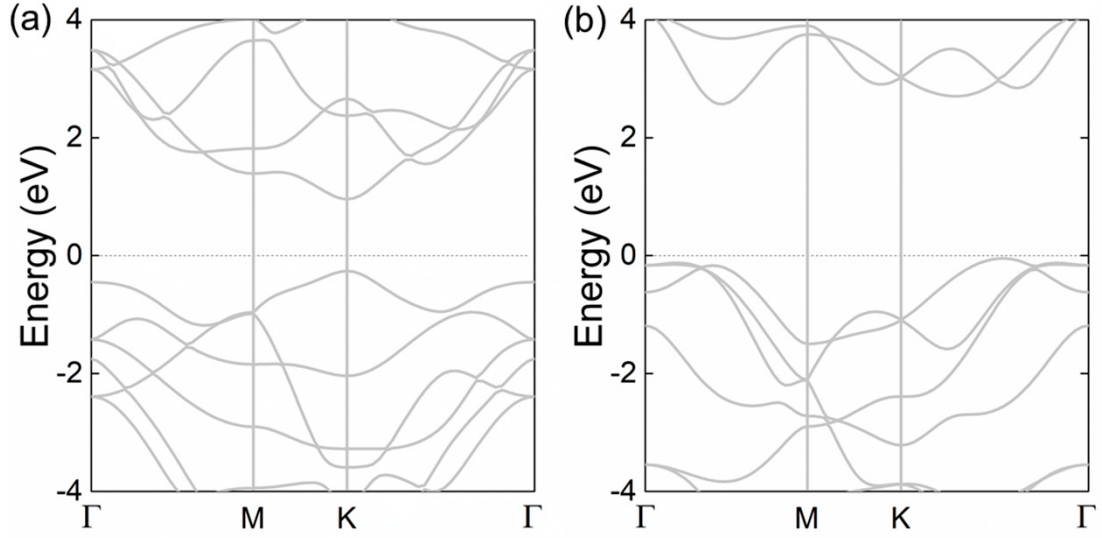

**Figure. S1** The HSE06 calculated band structure of the (a) MoTe<sub>2</sub> and (b) PtS<sub>2</sub> monolayers. The Fermi level is set as 0 eV.

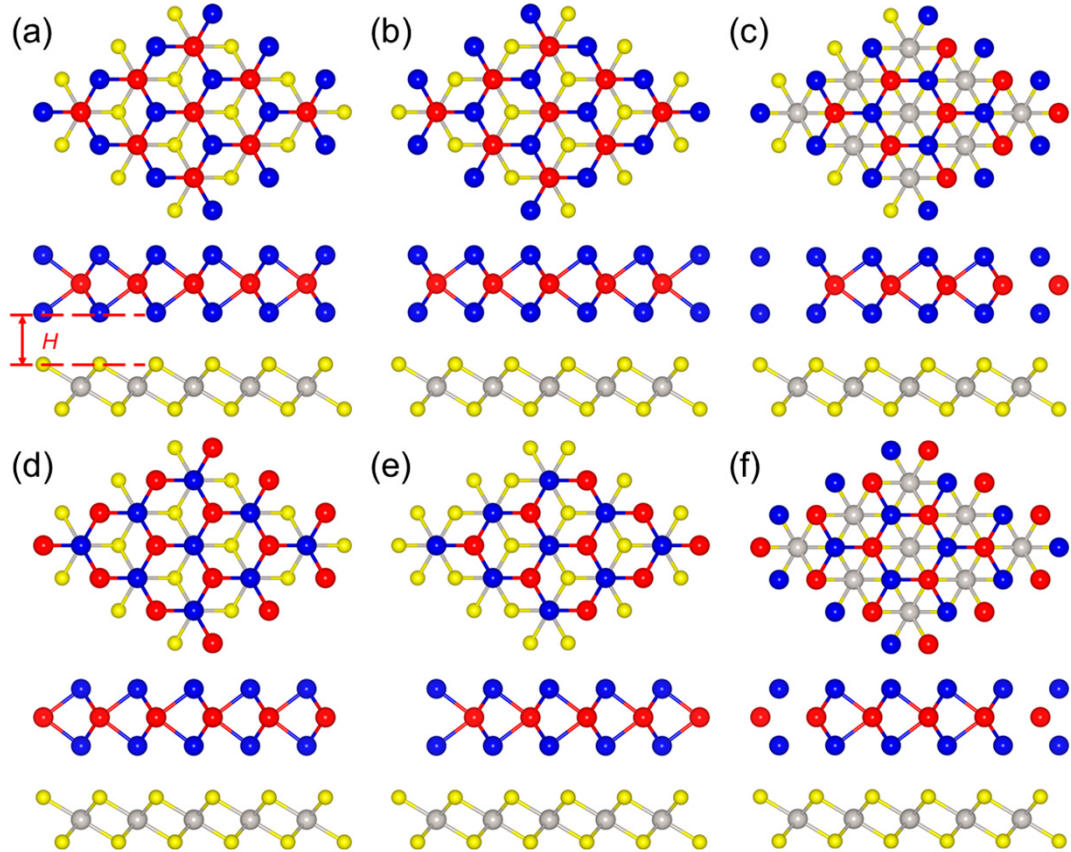

**Figure. S2** The MoTe<sub>2</sub>/PtS<sub>2</sub> heterostructure constructed by (a) P1, (b) P2, (c) P3, (d) P4, (e) P5 and (f) P6 stacking configurations. The yellow, gray, red, and blue balls represent S, Pt, Mo, and Te atoms, respectively.
